# Supplementary material for: Promotion of the invasion and metastasis of breast cancer by B7-H3 through CCR5High tumor-associated macrophages
Source: Research Square preprint supplement (doi:10.21203/rs.3.rs-5514342/v1), 2025-04-11
Supplement: Supplementary file 1 [file 4f46002c2324d8c358d56dba.pdf]

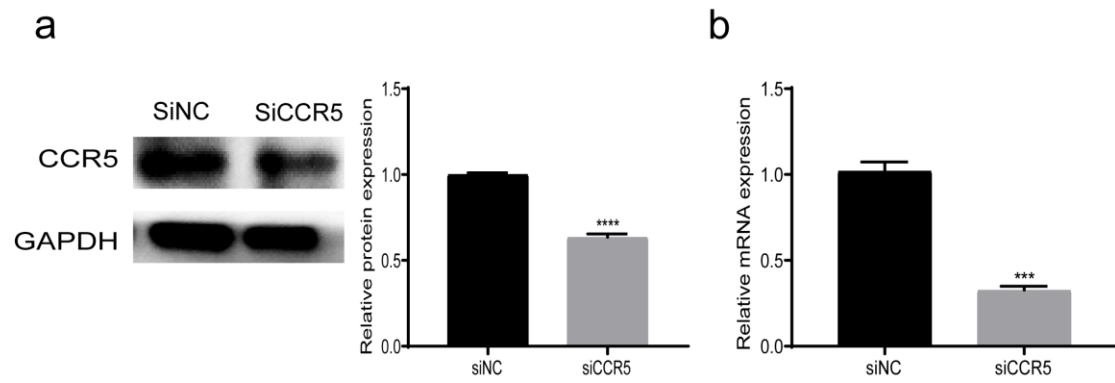

**Figure S1. Efficiency of CCR5 knockdown in polarized THP1 cells.** a. The CCR5 protein level in polarized THP1 cells transfected with siNC or siCCR5 for 24 h (left) was detected by western blotting. GAPDH acted as loading control. Bar graph (right) shows the densitometric analysis. b. The CCR5 mRNA level were detected by RT-PCR. GAPDH acted as loading control. \*\*\* $P < 0.001$ . Student's t-test were used to compared differences between 2 groups.
