# Supplementary material for: Promotion of the invasion and metastasis of breast cancer by B7-H3 through CCR5High tumor-associated macrophages
Source: Research Square preprint supplement (doi:10.21203/rs.3.rs-5514342/v1), 2025-04-11
Supplement: Supplementary file 1 [file 307e0d8b15227d586d653df4.docx]

| **Table S1.** Relationship between clinical characteristics and B7H3 expression on TAMs in patients with BC. | | | | | |
| --- | --- | --- | --- | --- | --- |
| Variables | B7H3 Expression | | Total | χ2 | *P* values |
| High | Low |
| Age（y） |  |  |  |  |  |
| >50 | 29 | 24 | 53 | 1.719 | 0.19 |
| ≤50 | 15 | 6 | 21 |
| T stage |  |  |  |  |  |
| T1/T2 | 40 | 26 | 66 | 0.328 | 0.567 |
| T3/T4 | 4 | 4 | 8 |
| N stage |  |  |  |  |  |
| N0 | 20 | 18 | 38 | 1.49 | 0.222 |
| N1/N2/N3 | 24 | 12 | 36 |
| TNM stage |  |  |  |  |  |
| Ⅰ/Ⅱ | 34 | 24 | 58 | 0.077 | 0.781 |
| Ⅲ/Ⅳ | 10 | 6 | 16 |
| KI67 |  |  |  |  |  |
| >15 | 33 | 25 | 58 | 1.326 | 0.249 |
| ≤15 | 11 | 4 | 15 |
| ER |  |  |  |  |  |
| (+) | 27 | 21 | 48 | 0.935 | 0.334 |
| (-) | 17 | 8 | 25 |
| PR |  |  |  |  |  |
| (+) | 10 | 13 | 23 | 3.902 | ***0.048*** |
| (-) | 34 | 16 | 50 |
| HER-2 |  |  |  |  |  |
| (+) | 12 | 4 | 16 | 1.83 | 0.176 |
| (-) | 32 | 25 | 57 |
| E-cadherin |  |  |  |  |  |
| (+) | 41 | 1 | 42 | 0.184 | 0.668 |
| (-) | 24 | 2 | 26 |
| Calponin |  |  |  |  |  |
| (+) | 10 | 25 | 35 | 1.6 | 0.206 |
| (-) | 2 | 18 | 20 |
| The difference between clinical characteristics and B7H3 expression on TAMs were compared using two-sided χ2 test.  Among the 74 patients with breast cancer (BC), one of which had no immunopathology, the median age was 54 years old (ranging between 25 and 62 years old). According to the size of tumor, 15 patients were at stage T1 (20.27%), 51 were at stage T2 (68.49%), and 8 were at stage T3 (10.81%). According to the number of lymph node metastasis, 38 patients were at stage N0 (51.35%), 21 were at stage N1 (28.38%), 7 were at stage N2 (9.46%), and 8 were at stage N3 (10.81%). According to the 9th AJCC staging system, 8 patients were at stage I (10.81%), 50 were at stage II (67.57%), 15 were at stage III (20.27%), and 1 were at stage IV (1.35%). Correlations between B7H3 levels on TAM and BC clinicopathological parameters were investigated using two-sided χ2 test. As listed in Table S1, the B7H3 levels on TAM was significantly correlated with PR (*P =* 0 .048), while B7H3 levels on TAM was not significantly correlated with age, N stage, TNM stage, Ki-67, ER, PR, HER2, E-cadherin and Calponin expression. | | | | | |
