# Supplementary material for: Promotion of the invasion and metastasis of breast cancer by B7-H3 through CCR5High tumor-associated macrophages
Source: Research Square preprint supplement (doi:10.21203/rs.3.rs-5514342/v1), 2025-04-11
Supplement: Supplementary file 2 [file 5646783f09c9ba3bb71e989c.docx]

**Table S2.** Relationship between clinical characteristics and B7H3/CCR5 expression on TAMs in patients with BC.

| Variables | B | Std.Error | Standardized Coefficients Beta | t | P values |
| --- | --- | --- | --- | --- | --- |
| B7H3/CCR5 | -0.829 | 1.088 |  | -0.762 | 0.449 |
| ER | -0.001 | 0.004 | -0.042 | -0.294 | 0.77 |
| PR | 0.001 | 0.006 | 0.03 | 0.211 | 0.834 |
| HER2 | -0.031 | 0.138 | -0.03 | -0.226 | 0.822 |
| KI67 | 0.006 | 0.007 | 0.124 | 0.922 | 0.36 |
| AGE（y） | 0.001 | 0.012 | 0.011 | 0.086 | 0.932 |
| T stage | 0.221 | 0.35 | 0.105 | 0.63 | 0.531 |
| N stage | -0.273 | 0.274 | -0.225 | -0.995 | 0.324 |
| TNM stage | 0.526 | 0.486 | 0.268 | 1.084 | 0.283 |
| E-cadherin | 0.573 | 0.385 | 0.19 | 1.49 | 0.142 |
| Calponin | -0.41 | 0.567 | -0.093 | -0.723 | 0.472 |

Correlations between B7H3/CCR5 levels on TAM and BC clinicopathological parameters were investigated using Multiple Linear Regression. As listed in Table S2, the B7H3/ccr5 levels on TAM was not significantly correlated with clinicopathological parameters(*P*=0.659).
